# Supplementary material
Source: PubMed Central journal article supplement (PMC4446967)
Supplement: NIHMS685632-supplement-01.pdf [file NIHMS685632-supplement-01.pdf]

**SUPPLEMENTAL TABLE.** List of the Assays for the Single Nucleotide Polymorphisms Reported in the Manuscript

| dbSNP ID#  | Applied Biosystems Assay ID | Sense Primer Sequence                 | Antisense Primer Sequence    | Probe Sequences                                                   |
|------------|-----------------------------|---------------------------------------|------------------------------|-------------------------------------------------------------------|
| rs1061170  | <i>Assay by Design</i>      | GGTCCTTAGGAAAATGTTAT<br>TTTCCTTATTTGG | GGCAGGCAACGTCTATAG<br>ATTACC | VIC: TTTCTCCAT <b>G</b> AATTTTG<br>FAM: TTCTCCAT <b>A</b> AATTTTG |
| rs1410996  | C__2530294_10               |                                       |                              |                                                                   |
| rs10490924 | C_29934973_20               |                                       |                              |                                                                   |
| rs9332739  | C_29531804_10               |                                       |                              |                                                                   |
| rs2230199  | C_26330755_10               |                                       |                              |                                                                   |
| rs10033900 | C_34681305_10               |                                       |                              |                                                                   |
| rs493258   | C__1929355_10               |                                       |                              |                                                                   |
| rs10468017 | C_29910029_10               |                                       |                              |                                                                   |
| rs9621532  | C_30611370_10               |                                       |                              |                                                                   |
| rs429358   | C__3084793_20               |                                       |                              |                                                                   |
| rs7412     | C__904973_10                |                                       |                              |                                                                   |
| rs1883025  | C__2959486_10               |                                       |                              |                                                                   |
| rs3764261  | C_27513218_10               |                                       |                              |                                                                   |
| rs12678919 | C__9639494_10               |                                       |                              |                                                                   |
